# Supplementary figures and images for: RNA polymerase errors cause splicing defects and can be regulated by differential expression of RNA polymerase subunits
Source: eLife journal article supplement (doi:10.7554/elife.09945), 2015-12-10

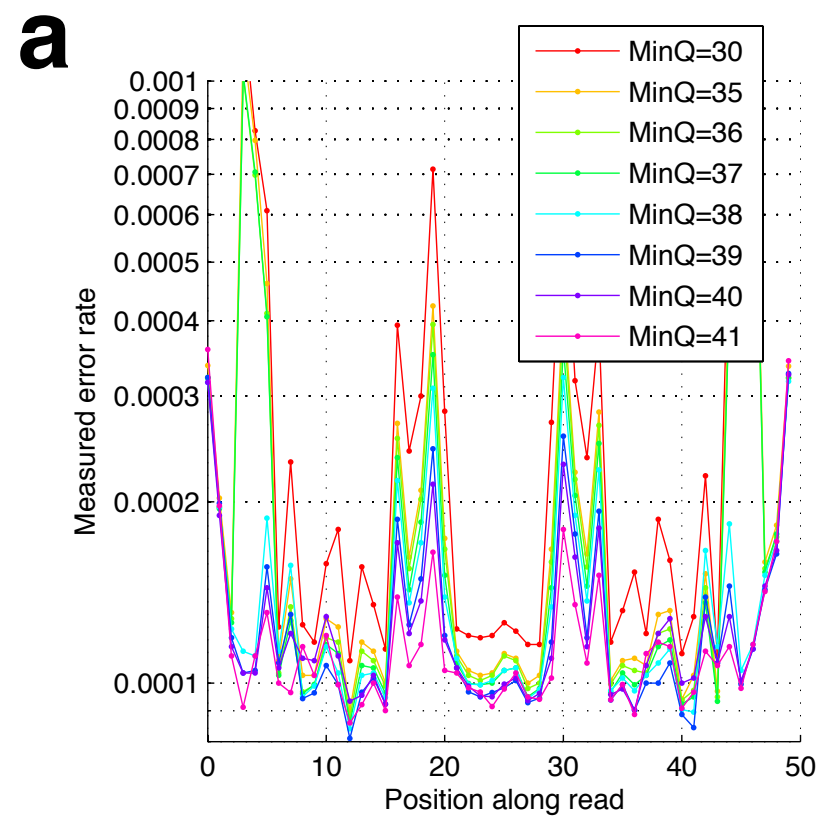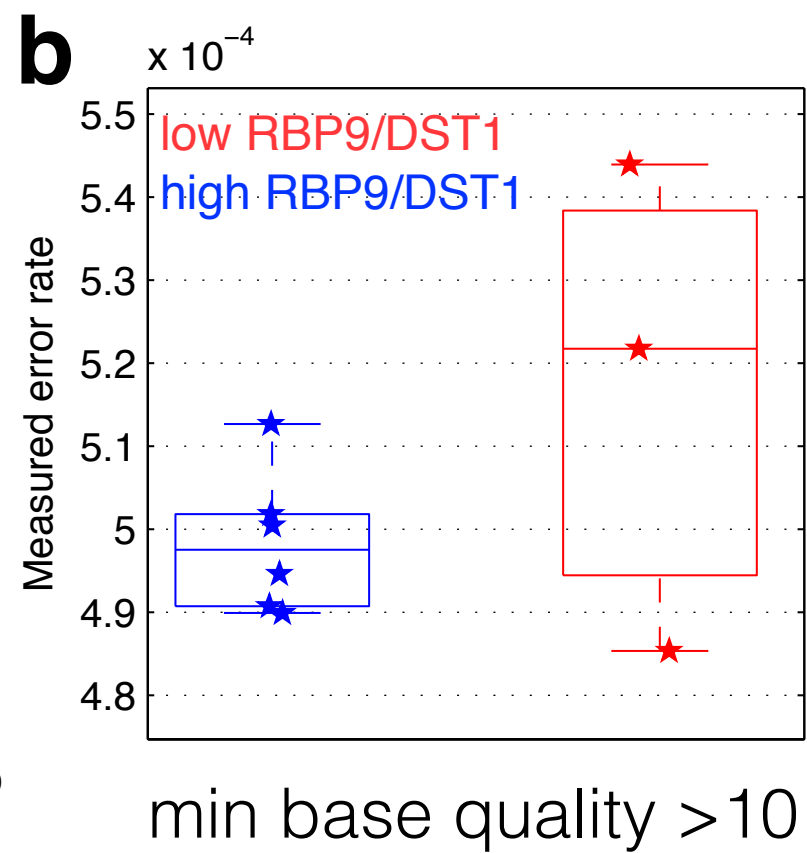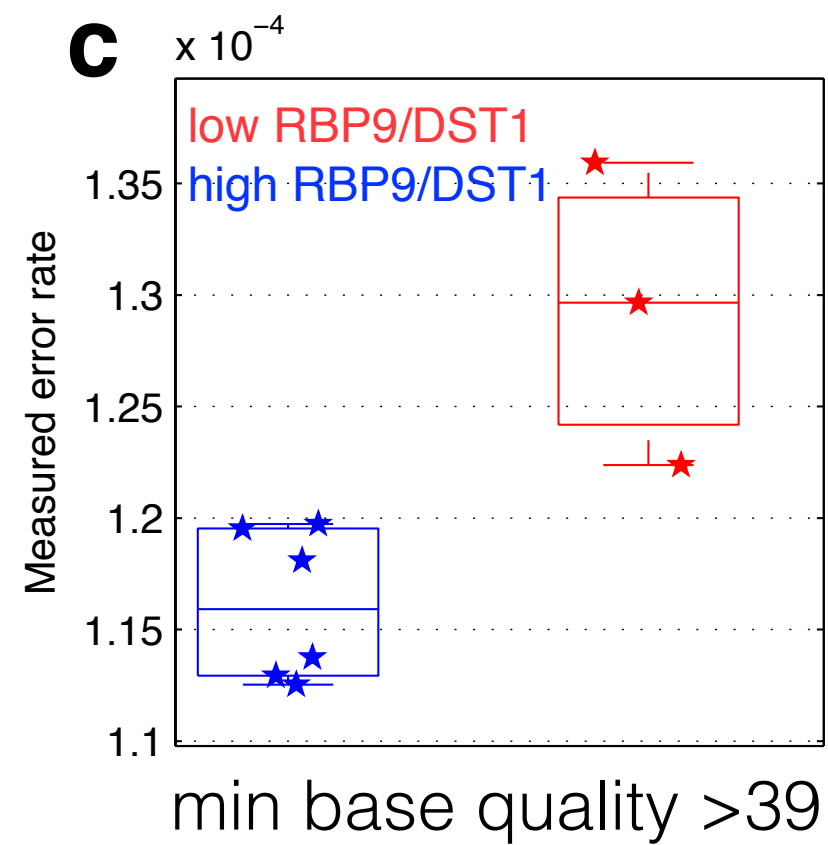

Supplement: supp [file elife_poa_e09945_Figure_1_figure_supplement_1.pdf › elife_poa_e09945_Figure_1_figure_supplement_1.pdf]

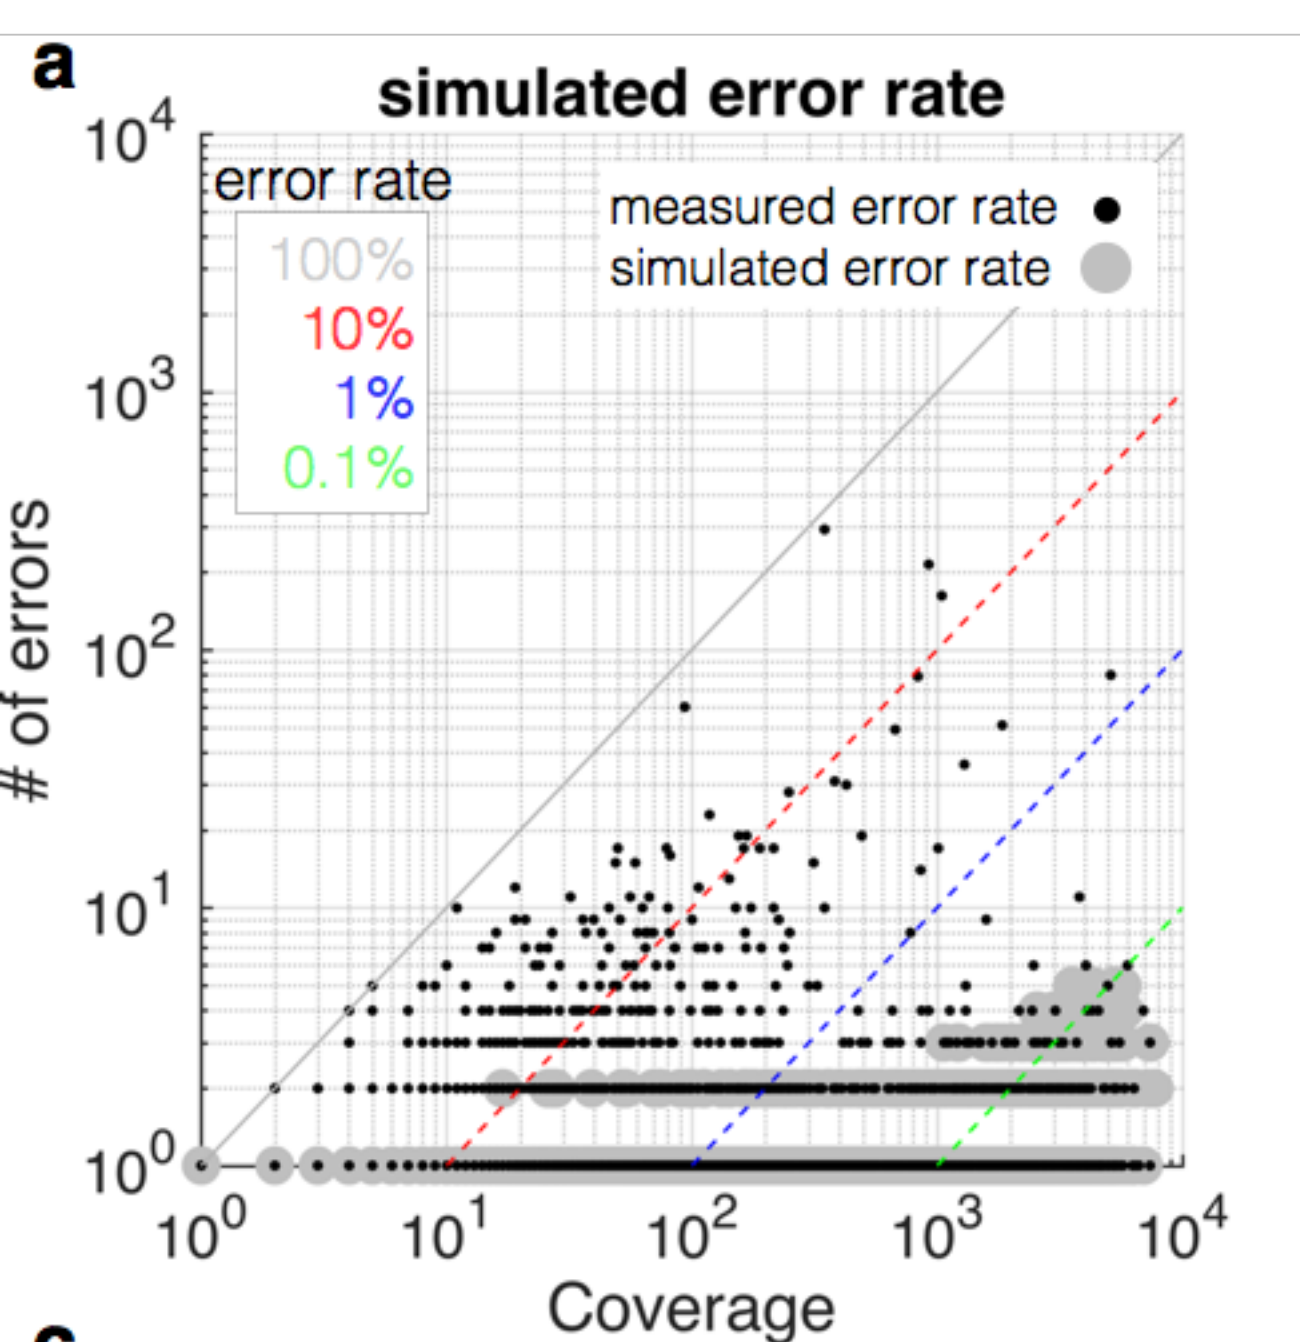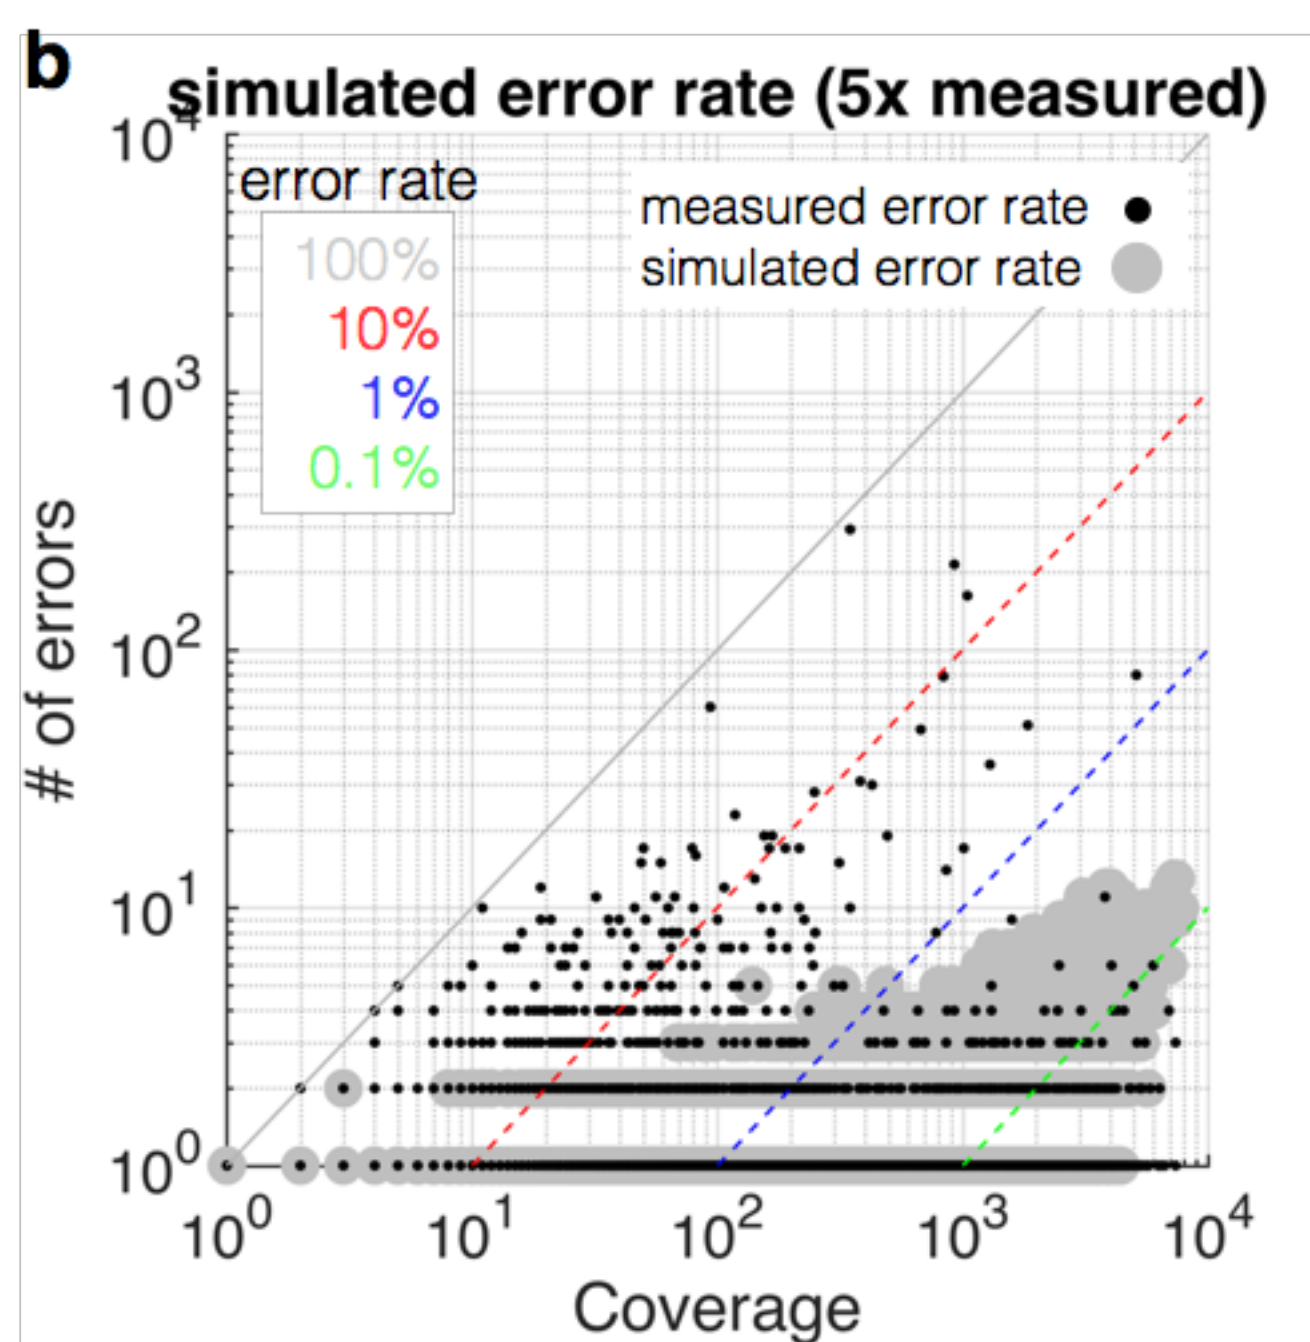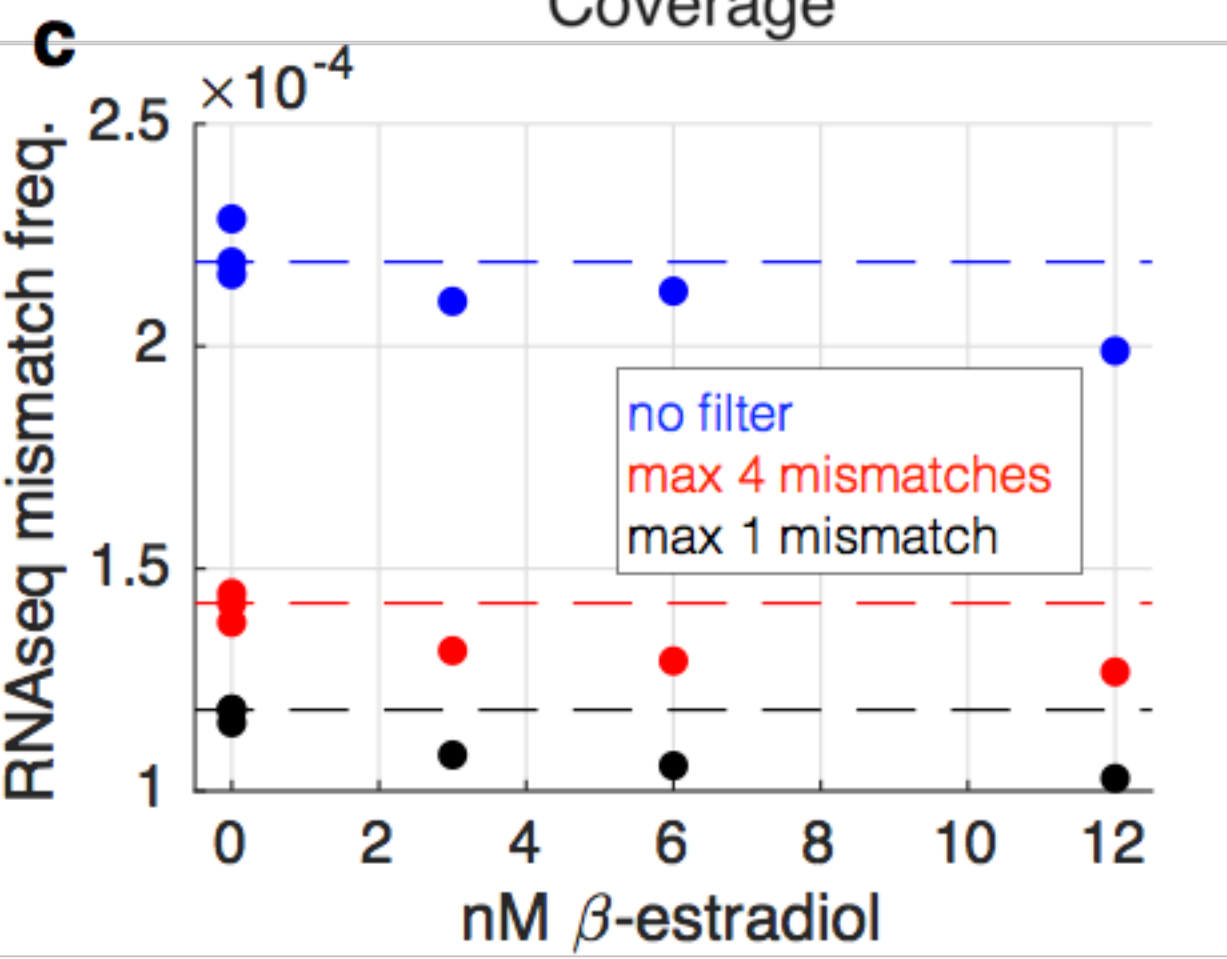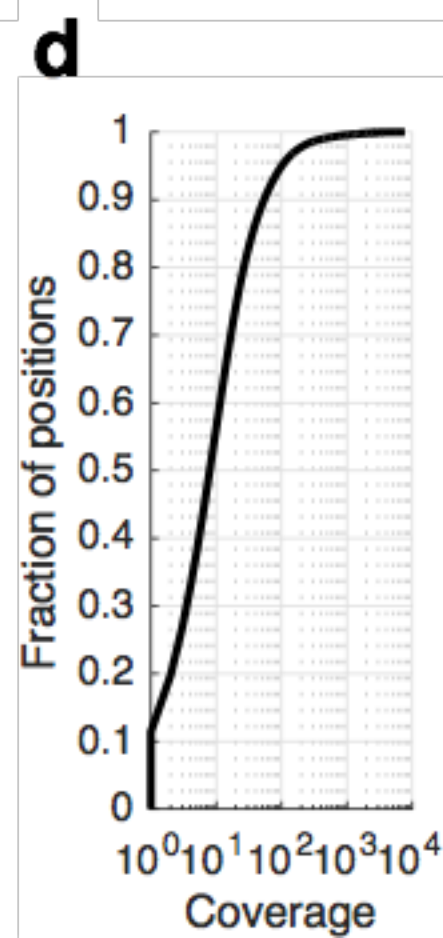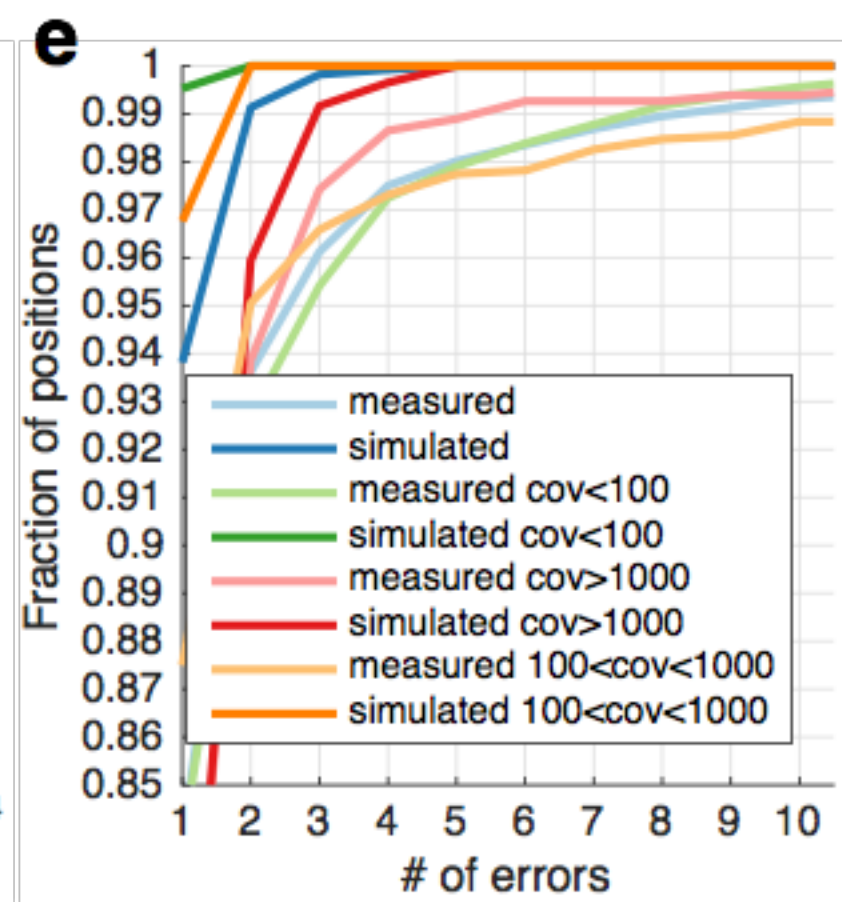

Supplement: supp [file elife_poa_e09945_Figure_1_figure_supplement_2.pdf › elife_poa_e09945_Figure_1_figure_supplement_2.pdf]

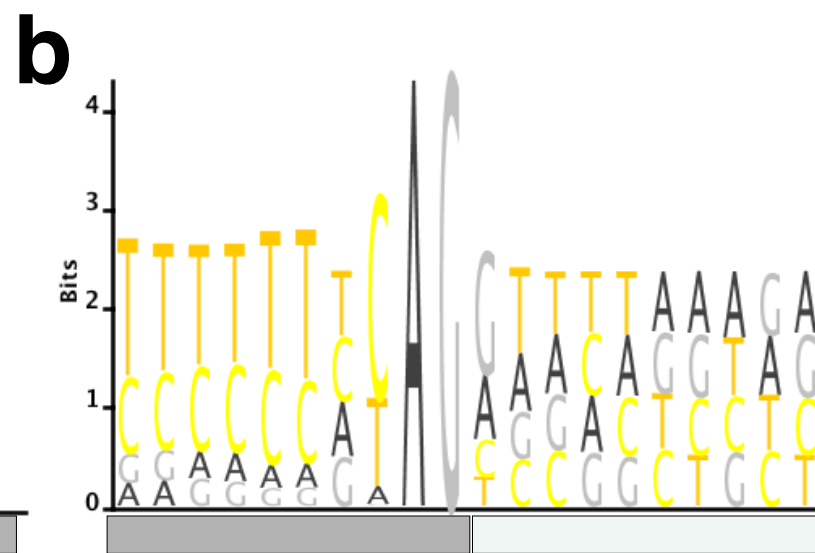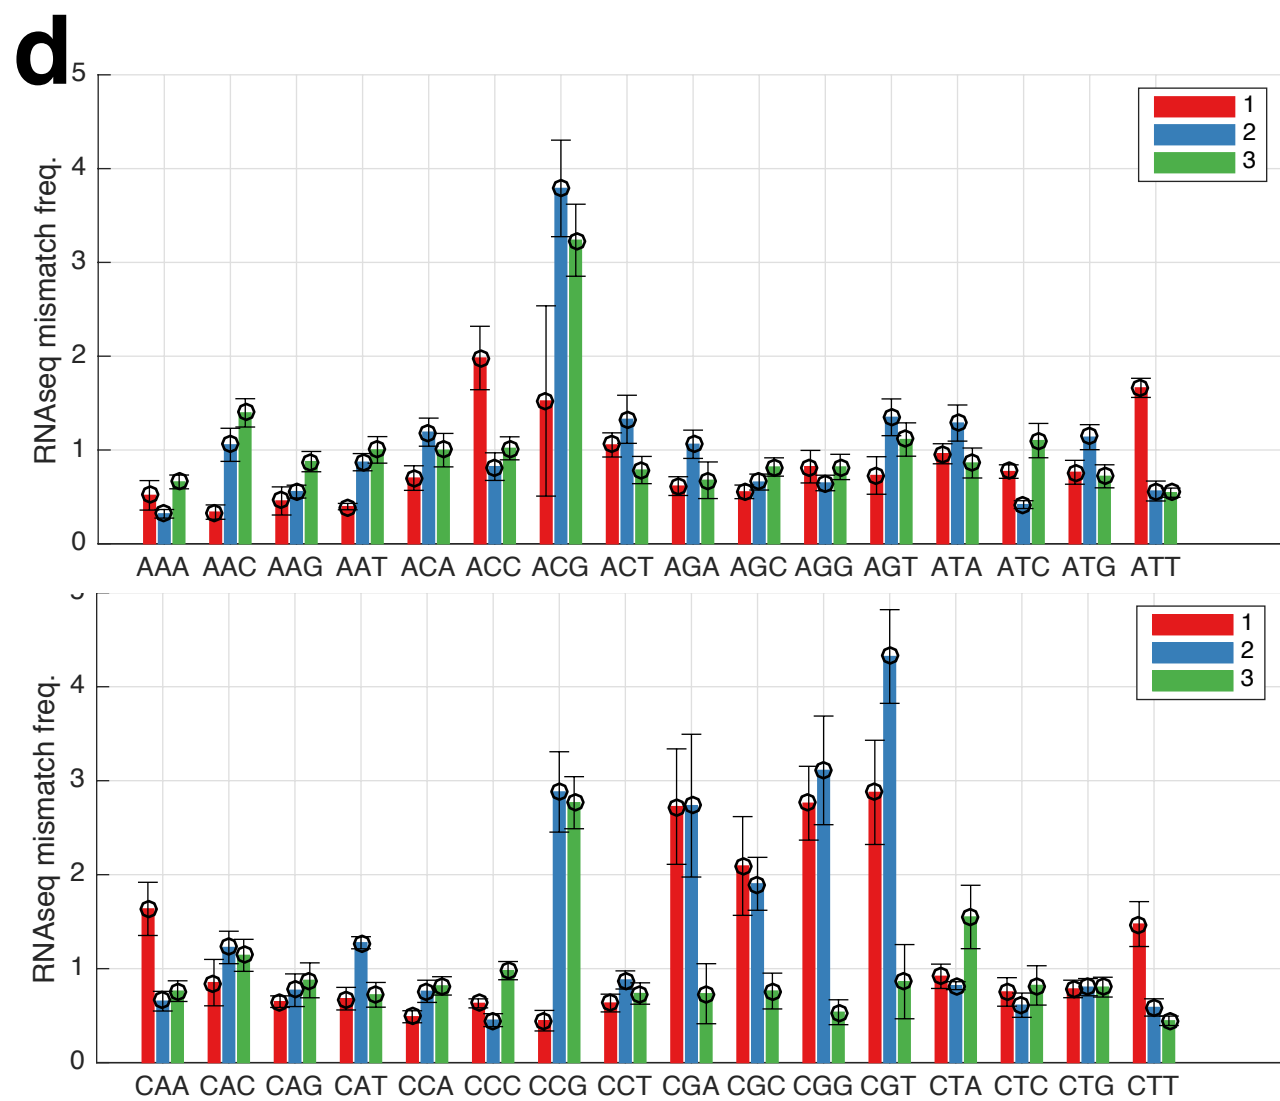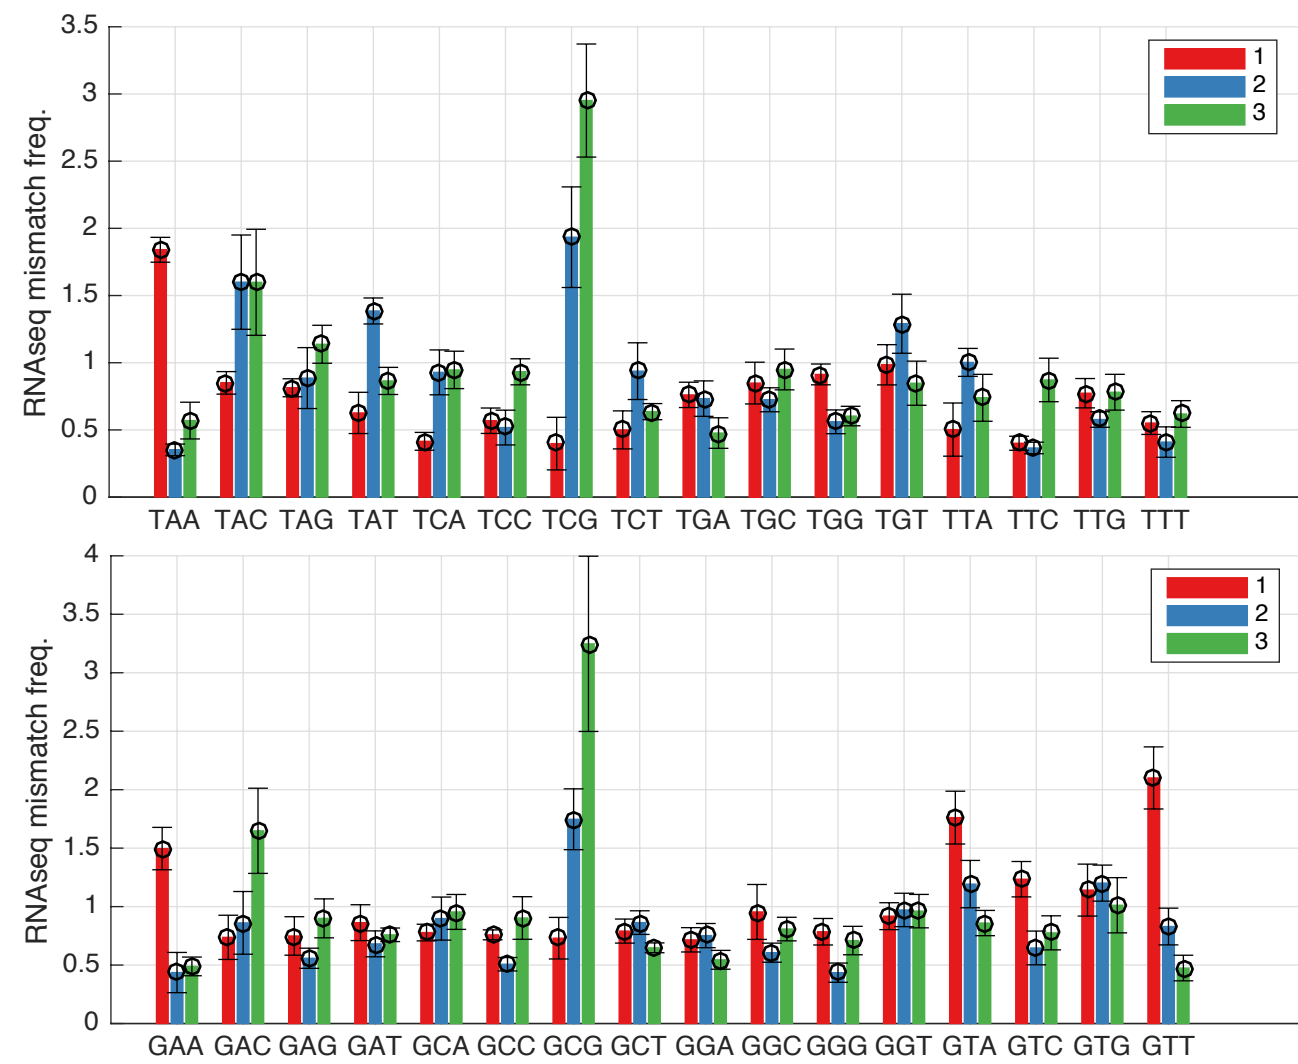

Supplement: supp [file elife_poa_e09945_Figure_2_figure_supplement_1.pdf › elife_poa_e09945_Figure_2_figure_supplement_1.pdf]

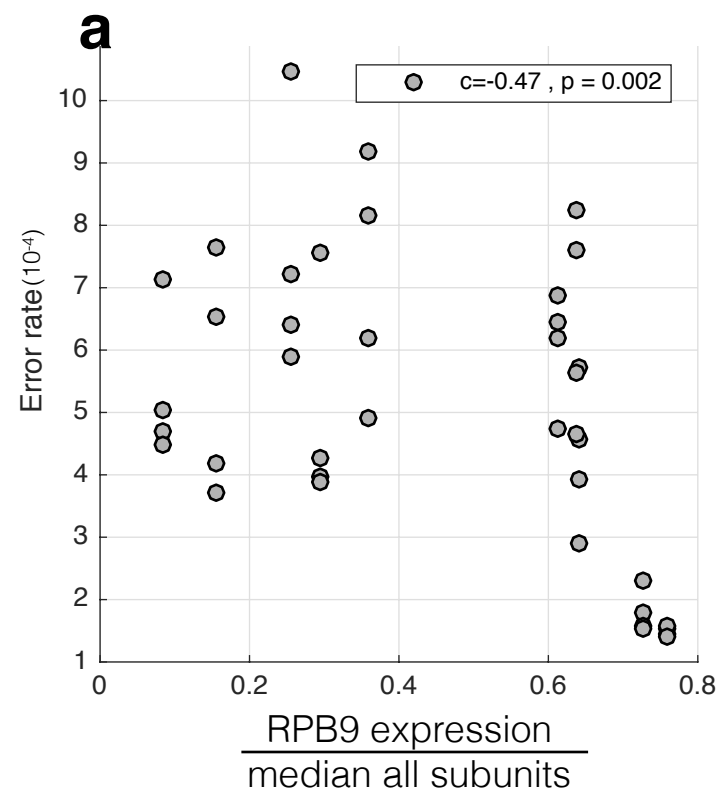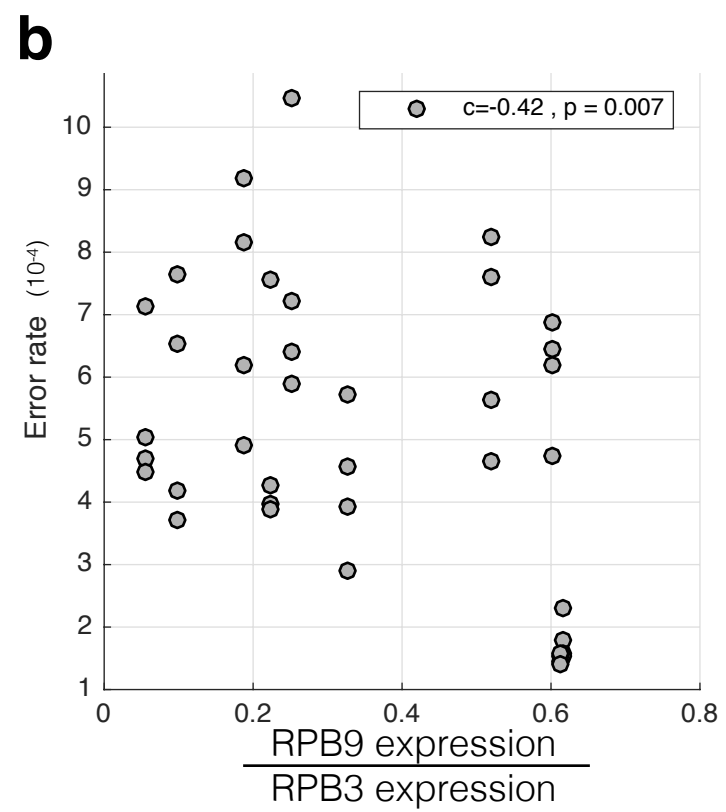

Supplement: supp [file elife_poa_e09945_Figure_2_figure_supplement_2.pdf › elife_poa_e09945_Figure_2_figure_supplement_2.pdf]

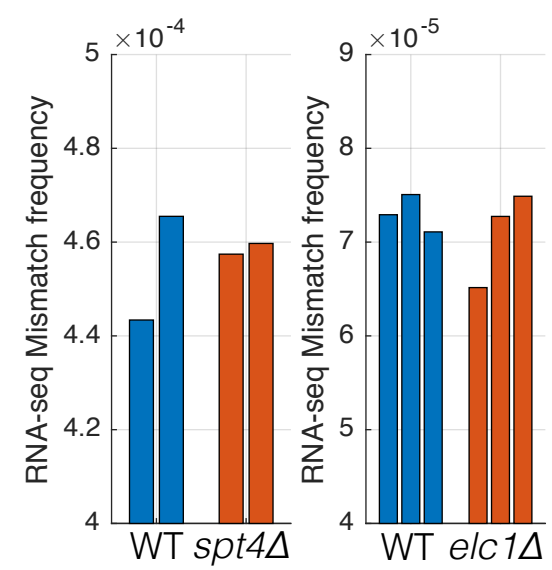

Supplement: supp [file elife_poa_e09945_Figure_3_figure_supplement_1.pdf › elife_poa_e09945_Figure_3_figure_supplement_1.pdf]

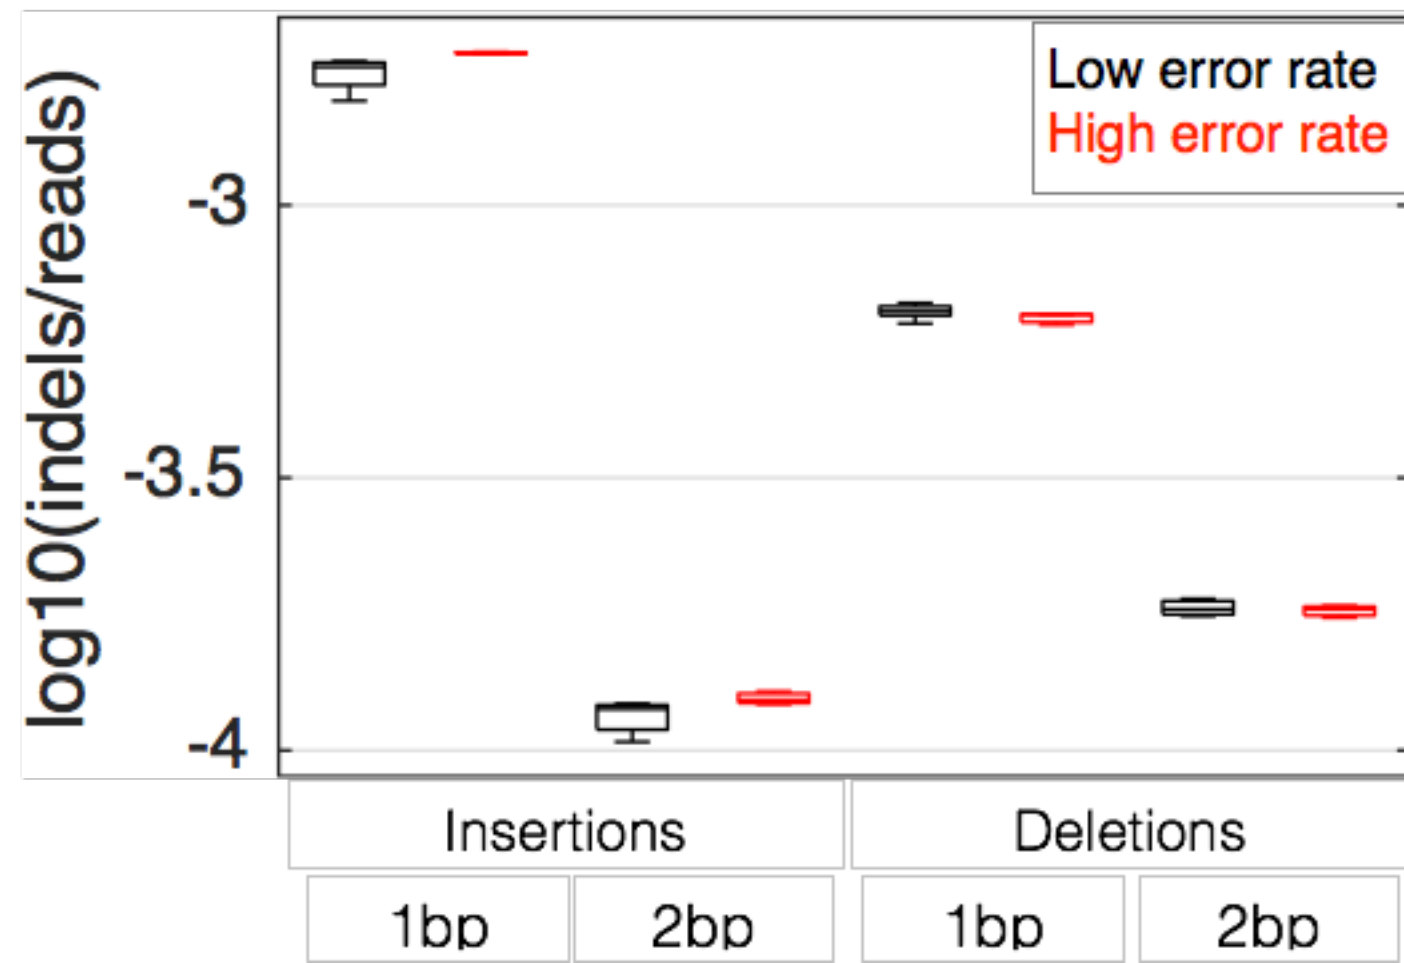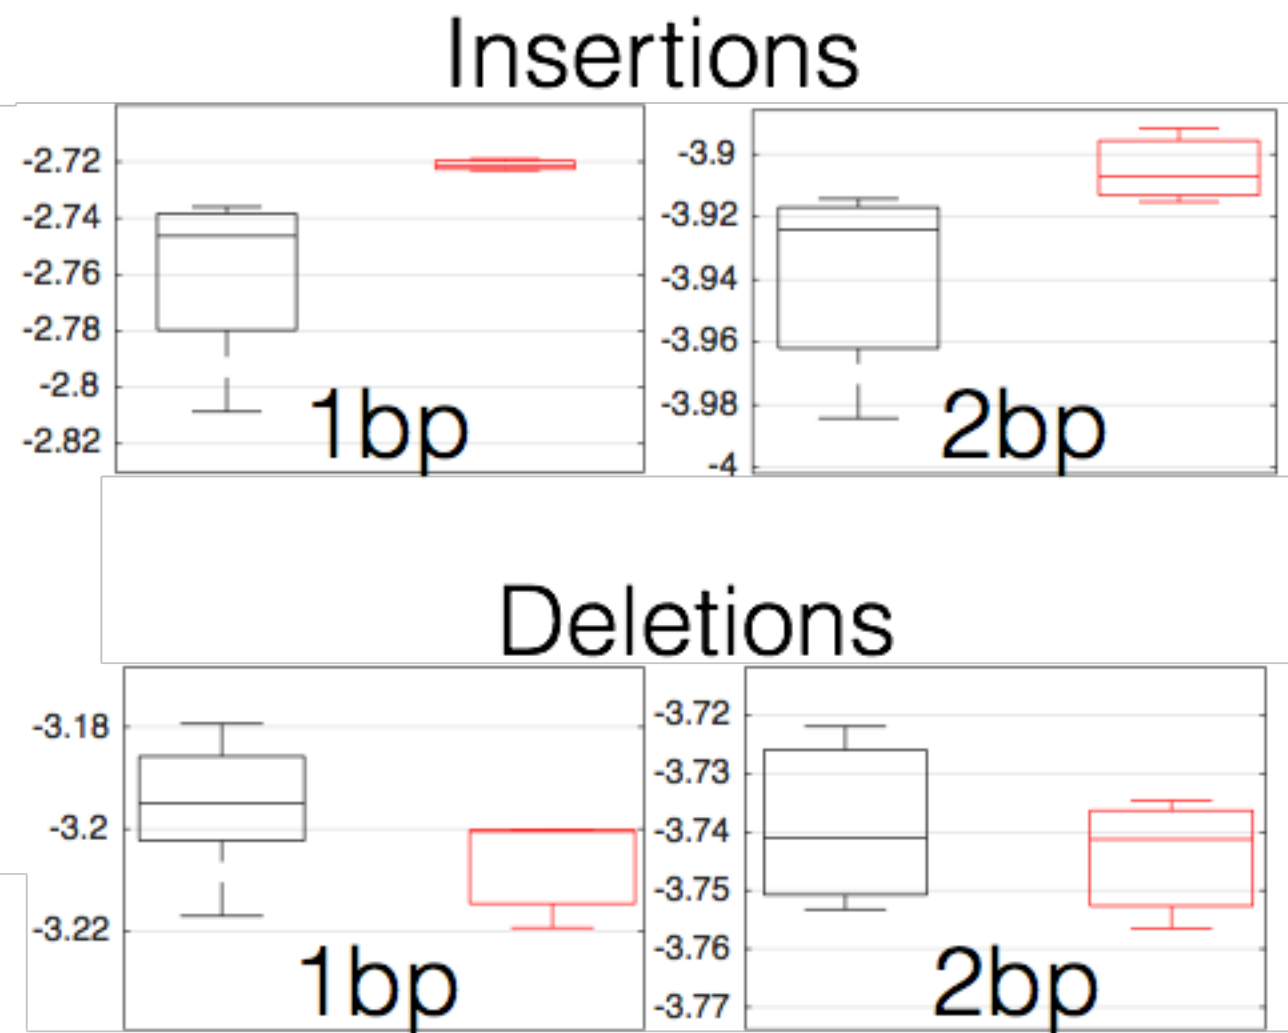

Supplement: supp [file elife_poa_e09945_Figure_3_figure_supplement_2.pdf › elife_poa_e09945_Figure_3_figure_supplement_2.pdf]
